# Supplementary material for: Aclidinium improves exercise endurance, dyspnea, lung hyperinflation, and physical activity in patients with COPD: a randomized, placebo-controlled, crossover trial
Source: PubMed Central journal article supplement (PMC4364572; doi:10.1186/1471-2466-14-209), 2014-12-23
Supplement: 12890_2014_644_MOESM1_ESM.pdf [file 12890_2014_644_MOESM1_ESM.pdf]

**Table.** Institutions and Independent Ethics Committees.

| Institution                                                              | Name, address and chairperson of local IEC                                                                                                               |
|--------------------------------------------------------------------------|----------------------------------------------------------------------------------------------------------------------------------------------------------|
| <i>Germany</i>                                                           |                                                                                                                                                          |
| INSAF GmbH<br>Biebricher Allee 34<br>65187 Wiesbaden                     | Ethikkommission der Landesärztekammer Hessen<br>Im Vogelsgesang 3<br>60488 Frankfurt am Main<br>Chairperson: Professor Dr S Harder                       |
| Praxis Gesine Groth, Dr Med<br>Erdkampsweg 49<br>Hamburg                 | Ethikkommission der Ärztekammer Hamburg<br>Humboldtstr. 67a<br>22083 Hamburg<br>Chairperson: Professor Dr T Weber                                        |
| Klin. Forschung Berlin Mitte GmbH<br>Georgenstraße 24<br>10117 Berlin    | Ethikkommission des Landes Berlin<br>Landesamt für Gesundheit und<br>Soziales<br>Fehrbelliner Platz 1<br>10707 Berlin<br>Chairperson: Professor Dr Fülle |
| PAREXEL International GmbH<br>Spandauer Damm 130 Haus 31<br>14050 Berlin | Ethikkommission des Landes Berlin<br>Landesamt für Gesundheit und<br>Soziales<br>Fehrbelliner Platz 1<br>10707 Berlin<br>Chairperson: Professor Dr Fülle |
| Hamburger Institut für Therapieforschung GmbH<br>Colonnaden 72           | Ethikkommission der Ärztekammer Hamburg<br>Humboldtstr. 67a                                                                                              |

---

|                                                                                                                     |                                                                                                                                                          |
|---------------------------------------------------------------------------------------------------------------------|----------------------------------------------------------------------------------------------------------------------------------------------------------|
| 20354 Hamburg                                                                                                       | 22083 Hamburg<br>Chairperson: Professor Dr T Weber                                                                                                       |
| KLB Gesundheitsforschung Lübeck GmbH<br>Pferdemarkt 6-8<br>23552 Lübeck                                             | Ethikkommission der Ärztekammer Schleswig-Holstein<br>Bismarckallee 8-12<br>23795 Bad Segeberg<br>Chairperson: Professor Dr G Hintze                     |
| Fraunhofer-Institut für Toxikologie und Experimentelle<br>Medizin ITEM<br>Nikolai-Fuchs-Straße 1a<br>30625 Hannover | Ethikkommission der Medizinischen Hochschule Hannover<br>Carl-Neuberg-Str. 1<br>30625 Hannover<br>Chairperson: Professor Dr HD Träger                    |
| Charité Research Organisation<br>Charitéplatz 1<br>10117 Berlin                                                     | Ethikkommission des Landes Berlin<br>Landesamt für Gesundheit<br>und Soziales<br>Fehrbelliner Platz 1<br>10707 Berlin<br>Chairperson: Professor Dr Fülle |
| Pneumologisches Forschungsinstitut am KH Großhansdorf<br>Wöhrendamm 80<br>22927 Großhansdorf                        | Ethikkommission der Ärztekammer Schleswig-Holstein<br>Bismarckallee 8-12<br>23795 Bad Segeberg<br>Chairperson: Professor Dr G Hintze                     |

---

---

IKF Pneumologie  
Stresemannallee 3  
Schaumainkai 101-103  
60596 Frankfurt

Ethikkommission der Landesärztekammer Hessen  
Im Vogelsgesang 3  
60488 Frankfurt am Main  
Chairperson: Professor Dr S Harder

*Spain*

Clínica Mediterránea de Neurociencias  
Neumología Vía Parque  
s/n Camino Viejo Alicante-Elche  
03114 Alicante

CEIC Clínica Mediterránea de Neurociencias  
Via Parque Alicante – Elche  
s/n 03114 Partida de Bacarot Alicante  
Chairperson: Not applicable

Hospital General Universitario Gregorio Marañón. Lab.  
Pruebas Funcionales C/ Dr Esquerdo, 46  
28007 Madrid

CEIC Área 1 - Hospital General Universitario Gregorio Marañón  
Fundación para la Investigación Biomédica  
Pabellón de Gobierno  
Planta baja  
C/ Dr Esquerdo, 46  
28007  
Madrid  
Chairperson: Not applicable

---

---

|                                                                                       |                                                                                                                                                                                                                     |
|---------------------------------------------------------------------------------------|---------------------------------------------------------------------------------------------------------------------------------------------------------------------------------------------------------------------|
| Hospital del Mar.<br>Servicio de Neumología Passeig del Mar, 25-29<br>08003 Barcelona | CEIC Parc de Salut Mar Consorci Mar Parc de Salut de Barcelona<br>Parc de Recerca Biomèdica de Barcelona (dcho. 163.03)<br>C/ Doctor Aiguader, 88<br>1ª planta<br>08003<br>Barcelona<br>Chairperson: Not applicable |
|---------------------------------------------------------------------------------------|---------------------------------------------------------------------------------------------------------------------------------------------------------------------------------------------------------------------|

*UK*

|                                                                                  |                                                                                                                        |
|----------------------------------------------------------------------------------|------------------------------------------------------------------------------------------------------------------------|
| Queen Anne Street Medical Centre<br>18-22 Queen Anne Street<br>London<br>W1G 8HU | London - Fulham REC<br>Charing Cross Hospital<br>Fulham Palace Road<br>London<br>W6 8RF<br>Chairperson: Not applicable |
|----------------------------------------------------------------------------------|------------------------------------------------------------------------------------------------------------------------|

---

IEC, Independent Ethics Committee.
