# Supplementary material for: Aclidinium improves exercise endurance, dyspnea, lung hyperinflation, and physical activity in patients with COPD: a randomized, placebo-controlled, crossover trial
Source: PubMed Central journal article supplement (PMC4364572; doi:10.1186/1471-2466-14-209), 2014-12-23
Supplement: 12890_2014_644_MOESM2_ESM.pdf [file 12890_2014_644_MOESM2_ESM.pdf]

**Table. Prior COPD medication use according to therapeutic category.** The proportion of patients using pre-study medication for COPD. Pre-study medication was defined as any medication taken within 15 days prior to informed consent up to the date of informed consent (safety population).

| <b>COPD medication category, n (%)<sup>a</sup></b> | <b>N=112</b> |
|----------------------------------------------------|--------------|
| Any COPD medication                                | 100 (89.3)   |
| SABA                                               | 84 (75.0)    |
| LAMA                                               | 37 (33.0)    |
| LABA                                               | 22 (19.6)    |
| LABA + ICS                                         | 22 (19.6)    |
| ICS                                                | 15 (13.4)    |
| Other <sup>b</sup>                                 | 9 (8.0)      |
| SABA + SAMA                                        | 6 (5.4)      |

<sup>a</sup>Patients were counted separately in each of the medication categories.

<sup>b</sup>COPD medications used by  $\leq 3$  patients each. Includes SAMAs, xanthines, influenza vaccines, oral PDE4 inhibitors, oxygen and systemic corticosteroids.

COPD, chronic obstructive pulmonary disease; ICS, inhaled corticosteroid; LABA, long-acting  $\beta_2$ -agonist; LAMA, long-acting muscarinic antagonist; PDE4, phosphodiesterase-4; SABA, short-acting  $\beta_2$ -agonist; SAMA, short-acting muscarinic antagonist.
