# Supplementary material for: Aclidinium improves exercise endurance, dyspnea, lung hyperinflation, and physical activity in patients with COPD: a randomized, placebo-controlled, crossover trial
Source: PubMed Central journal article supplement (PMC4364572; doi:10.1186/1471-2466-14-209), 2014-12-23
Supplement: 12890_2014_644_MOESM3_ESM.pdf [file 12890_2014_644_MOESM3_ESM.pdf]

**Figure. Change from baseline in IC during exercise at Week 3.** Change from baseline in IC every 2 min during exercise (constant work rate cycle ergometry; ITT population).

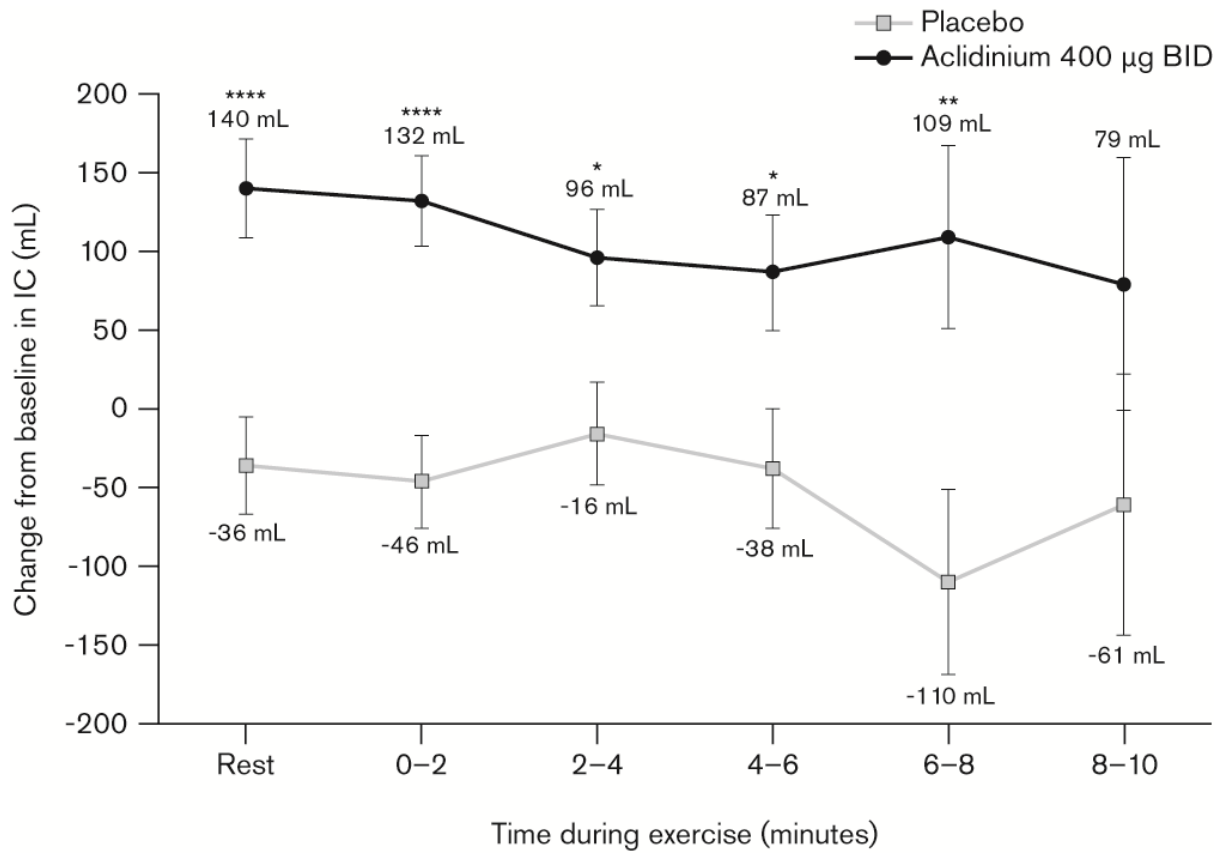

Data reported as least squares means change from baseline (analysis of covariance) + standard error;

\* p < 0.05, \*\* p < 0.01, \*\*\*\* p < 0.0001 versus placebo.

BID, twice daily; IC, inspiratory capacity; ITT, intent-to-treat.
