# Supplementary material for: Aclidinium improves exercise endurance, dyspnea, lung hyperinflation, and physical activity in patients with COPD: a randomized, placebo-controlled, crossover trial
Source: PubMed Central journal article supplement (PMC4364572; doi:10.1186/1471-2466-14-209), 2014-12-23
Supplement: 12890_2014_644_MOESM4_ESM.pdf [file 12890_2014_644_MOESM4_ESM.pdf]

**Table. Relationship between physical activity, endurance time, and exertional dyspnea.** Pearson correlation for change from baseline in mean daily step count, mean duration of at least moderate activity (>3 metabolic equivalents), endurance time during constant work rate cycle ergometry to symptom limitation at 75% of the maximum work rate and exertional dyspnea at isotime across the study (aclidinium treatment period only; ITT population).

|                                                                                       |                                                                                   | Observations <sup>a</sup> | Correlation | P-value |
|---------------------------------------------------------------------------------------|-----------------------------------------------------------------------------------|---------------------------|-------------|---------|
| Change from baseline in daily step count <sup>b</sup>                                 | Change from baseline in endurance time (s)                                        | 85                        | 0.109       | 0.319   |
|                                                                                       | Change from baseline in duration of at least moderate activity (min) <sup>b</sup> | 85                        | 0.694       | <0.0001 |
| Change from baseline in duration of at least moderate activity (min/day) <sup>b</sup> | Change from baseline in endurance time (s)                                        | 85                        | 0.022       | 0.844   |
| Change from baseline in endurance time (s)                                            | Change from baseline in exertional dyspnea at isotime                             | 109                       | -0.489      | <0.0001 |

<sup>a</sup>Number of observations used to calculate the correlation.

<sup>b</sup>Patients with  $\geq 5$  days with data.

ITT, intent-to-treat.
